# Supplementary material for: Telephone-Based Coaching and Prompting for Physical Activity: Short- and Long-Term Findings of a Randomized Controlled Trial (Movingcall)
Source: MDPI journal article supplement (doi:10.3390/ijerph16142626), 2019-07-23
Supplement: s1 [file s1]

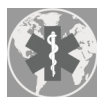

*Supplementary Material*

**Telephone-Based Coaching and Prompting for Physical Activity: Short- and Long-Term Findings of a Randomized Controlled Trial (Movingcall)**

Xenia Fischer, Jan-Niklas Kreppke, Lukas Zahner, Markus Gerber, Oliver Faude and Lars Donath

## S2: Supplementary File on Acceptance and Perception Related Questions

**Table1.** Acceptance and perception related questions: Mean and standard deviation per study arm.

|                                                   | Time of Assessment | Translated Question                                                                              | Translated Answer on Likert Scale | Control   | Coaching  | Coaching and SMS | p-value ANOVA | $\eta^2$ |
|---------------------------------------------------|--------------------|--------------------------------------------------------------------------------------------------|-----------------------------------|-----------|-----------|------------------|---------------|----------|
|                                                   |                    |                                                                                                  |                                   | Mean (SD) | Mean (SD) | Mean (SD)        |               |          |
| General acceptance and perception of intervention | 6 months           | In general, I am satisfied with this intervention.                                               | 1 = not true                      | 2.0 (0.8) | 3.5 (0.6) | 3.7 (0.6)        | < 0.001       | 0.481    |
|                                                   |                    |                                                                                                  | 2 = rather not true               |           |           |                  |               |          |
|                                                   |                    |                                                                                                  | 3 = rather true                   |           |           |                  |               |          |
|                                                   |                    |                                                                                                  | 4 = true                          |           |           |                  |               |          |
|                                                   | 6 months           | The program helps me to achieve my physical activity and exercise goals.                         | 1 = not true                      | 1.7 (0.8) | 3.4 (0.7) | 3.4 (0.6)        | < 0.001       | 0.463    |
|                                                   |                    |                                                                                                  | 2 = rather not true               |           |           |                  |               |          |
|                                                   |                    |                                                                                                  | 3 = rather true                   |           |           |                  |               |          |
|                                                   |                    |                                                                                                  | 4 = true                          |           |           |                  |               |          |
|                                                   | 6 months           | This program helps me to be more physical active in my everyday life in the long-term (>1 year). | 1 = not true                      | 2.2 (1.1) | 3.5 (0.8) | 3.6 (0.6)        | < 0.001       | 0.284    |
|                                                   |                    |                                                                                                  | 2 = rather not true               |           |           |                  |               |          |
|                                                   |                    |                                                                                                  | 3 = rather true                   |           |           |                  |               |          |
|                                                   |                    |                                                                                                  | 4 = true                          |           |           |                  |               |          |

|                                                   |          |                                                                                                           |                                                                               |           |           |           |         |       |
|---------------------------------------------------|----------|-----------------------------------------------------------------------------------------------------------|-------------------------------------------------------------------------------|-----------|-----------|-----------|---------|-------|
|                                                   | 6 months | This program will help me in the future to motivate myself to be regularly physically active.             | 1 = not true<br>2 = rather not true<br>3 = rather true<br>4 = true            | 2.1 (1.1) | 3.4 (0.7) | 3.4 (0.7) | < 0.001 | 0.286 |
| Activity profile                                  | 3 months | In general, the profile on www.movingcall.com is understandable and easy to use.                          | 1 = not true<br>2 = rather not true<br>3 = rather true<br>4 = true            | 2.8 (1.0) | 3.3 (0.7) | 3.3 (0.7) | < 0.001 | 0.074 |
|                                                   | 3 months | Did you use "my plan"? (e.g. to adapt the plan, to look up exercises in the catalogue or to write a note) | 1 = No, never<br>2 = Rarely<br>3 = Yes, but irregularly<br>4 = Yes, regularly | 2.6 (0.9) | 3.3 (0.8) | 3.3 (0.8) | < 0.001 | 0.090 |
| Perception and participation of the control group | 3 months | How often did you read the entire recommendation on physical activity?                                    | Number                                                                        | 2.4 (3.0) |           |           |         |       |
|                                                   | 3 months | Is the recommendation formulated in an understandable way?                                                | 1 = no<br>2 = rather no<br>3 = rather yes<br>4 = yes                          | 3.6 (0.8) |           |           |         |       |
|                                                   | 3 months | Is the advice in your recommendation tailored to your personal situation in life?                         | 1 = no<br>2 = rather no<br>3 = rather yes<br>4 = yes                          | 2.6 (0.9) |           |           |         |       |

|                                                                                      |          |                                                                                                        |                                                                    |           |           |       |       |
|--------------------------------------------------------------------------------------|----------|--------------------------------------------------------------------------------------------------------|--------------------------------------------------------------------|-----------|-----------|-------|-------|
| <b>Perception and participation of the coaching and the coaching &amp; SMS group</b> | 6 months | Did the phone calls take place regularly?                                                              | 1 = no<br>2 = mostly<br>3 = yes                                    | 2.9 (0.3) | 2.9 (0.3) | 0.520 | 0.009 |
|                                                                                      | 6 months | The duration of the phone calls was ...                                                                | 1 = too short<br>2 = appropriate<br>3 = too long                   | 2.0 (0.2) | 2.0 (0.1) | 0.368 | 0.005 |
|                                                                                      | 6 months | The intervals of the phone calls were ...                                                              | 1 = too short<br>2 = appropriate<br>3 = too long                   | 2.0 (0.3) | 2.0 (0.2) | 0.749 | 0.004 |
|                                                                                      | 6 months | My coach and I had a trusting relationship.                                                            | 1 = not true<br>2 = rather not true<br>3 = rather true<br>4 = true | 3.8 (0.5) | 3.9 (0.3) | 0.524 | 0.015 |
|                                                                                      | 6 months | Our relationship was characterized by mutual respect.                                                  | 1 = not true<br>2 = rather not true<br>3 = rather true<br>4 = true | 3.9 (0.2) | 4.0 (0.2) | 0.311 | 0.006 |
|                                                                                      | 6 months | I was coached according to my current state of my physical activity (e.g. appropriate goals were set). | 1 = not true<br>2 = rather not true<br>3 = rather true<br>4 = true | 3.9 (0.4) | 3.9 (0.4) | 0.498 | 0.009 |
|                                                                                      | 6 months | I do collaborate with my coach during the coaching process.                                            | 1 = not true<br>2 = rather not true<br>3 = rather true<br>4 = true | 3.7 (0.5) | 3.8 (0.5) | 0.649 | 0.006 |
|                                                                                      |          |                                                                                                        |                                                                    |           |           |       |       |

|                                                                     |          |                                                 |                                                                                                                                                |                  |
|---------------------------------------------------------------------|----------|-------------------------------------------------|------------------------------------------------------------------------------------------------------------------------------------------------|------------------|
| <b>Perception and participation of the coaching &amp; SMS group</b> | 6 months | Did you always receive 4 SMS between the calls? | 1 = I have not received any SMS<br>2 = No, not always<br>3 = Yes, always                                                                       | <b>2.9 (0.3)</b> |
|                                                                     | 6 months | Do you perceive the SMS overall as supporting?  | 1 = No, they are not supportive<br>2 = No, they are rather not supportive<br>3 = Yes, they are more supportive<br>4 = Yes, they are supportive | <b>3.4 (0.8)</b> |
|                                                                     | 6 months | How do you rate the frequency of the SMS?       | 1 = Too rare<br>2 = Appropriate<br>3 = Too often                                                                                               | <b>2.1 (0.4)</b> |

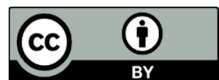

© 2019 by the authors. Submitted for possible open access publication under the terms and conditions of the Creative Commons Attribution (CC BY) license (<http://creativecommons.org/licenses/by/4.0/>).
